# Supplementary material for: Improving the Accuracy and Efficiency of Respiratory Rate Measurements in Children Using Mobile Devices
Source: PubMed Central journal article supplement (PMC4053345; doi:10.1371/journal.pone.0099266), 2014-06-11
Supplement: pone.0099266.s002.pdf [file pone.0099266.s002.pdf]

## S2 Regression Model of NRMSE

All coefficients of the regression model for NRMSE were highly significant (p-values are all <0.001, table S1). The model is fairly accurate with an  $R^2$  value 0.97, indicating that 97% of the variability in NRMSE can be accounted for by  $z$  and  $Th_C$ . Therefore, we confirm that the accuracy improves when the number of consecutive time intervals used increases, provided that number does not exceed 12 (Figure S1).

The regression formula is

$$\widehat{NRMSE} = 4.11 - 1.50z + 0.06z^2 + 2.88\sqrt{Th_C} - 0.25Th_C + err$$

Thus, for a fixed  $Th_C$ , when  $z$  is no greater than 12 and increases from  $x$  to  $x+1$ , the NRMSE is expected to decrease by

$$4.11 - 1.50x + 0.06x^2 - [4.11 - 1.50(x + 1) + 0.06(x + 1)^2] = 1.44 - 0.12x.$$

This decrease quantity is non-negative when  $n \leq 12$ ; that is, the change in the expected NRMSE (i.e. the trend) is going to reverse direction when  $n$  exceeds 12. For example, NRMSE decreases by 1.2 when  $z$  increases from  $z=2$  to  $z=3$ , and the decrease is 1.06 if  $z$  increases from  $z=3$  to  $z=4$ .

For a fixed  $z$ , the expected decrease in NRMSE when  $Th_C$  decreases from  $(y + 1)^2$  to  $y^2$  is

$$2.88\sqrt{(y + 1)^2} - 0.25(y + 1)^2 - [2.88\sqrt{y^2} - 0.25y] = 2.63 - 0.50y.$$

Therefore, we confirm that the accuracy improves when time intervals are more consistent.

For example, NRMSE decreases by 1.63 when  $Th_C$  decreases from 9% to 4%, and it decreases by 2.13 when  $Th_C$  from 4% to 1%.

The quantity  $2.63 - 0.50k$  is negative when  $k \geq 5.26$ . So the decreases in NRMSE when  $Th_C$  decreases from  $(6 + 1)^2 = 49$  (%) is to  $6^2 = 36$  (%) is negative according to the model. This is because the input value is beyond the range of the data on which the model was built, which is 30% in our case.

**Table S1. NRMSE Model Coefficients**

| Coefficient | Estimate | Std. Error | t value | Pr(>  t )  |
|-------------|----------|------------|---------|------------|
| $a_1$       | 4.1054   | 0.2321     | 17.7    | <0.001 *** |
| $a_2$       | -1.4973  | 0.0278     | -54.0   | <0.001 *** |
| $a_3$       | 0.0587   | 0.0016     | 36.6    | <0.001 *** |
| $a_4$       | 2.8828   | 0.1271     | 22.7    | <0.001 *** |
| $a_5$       | -0.2498  | 0.0175     | -14.3   | <0.001 *** |

Coefficients and significance for NRMSE linear model.

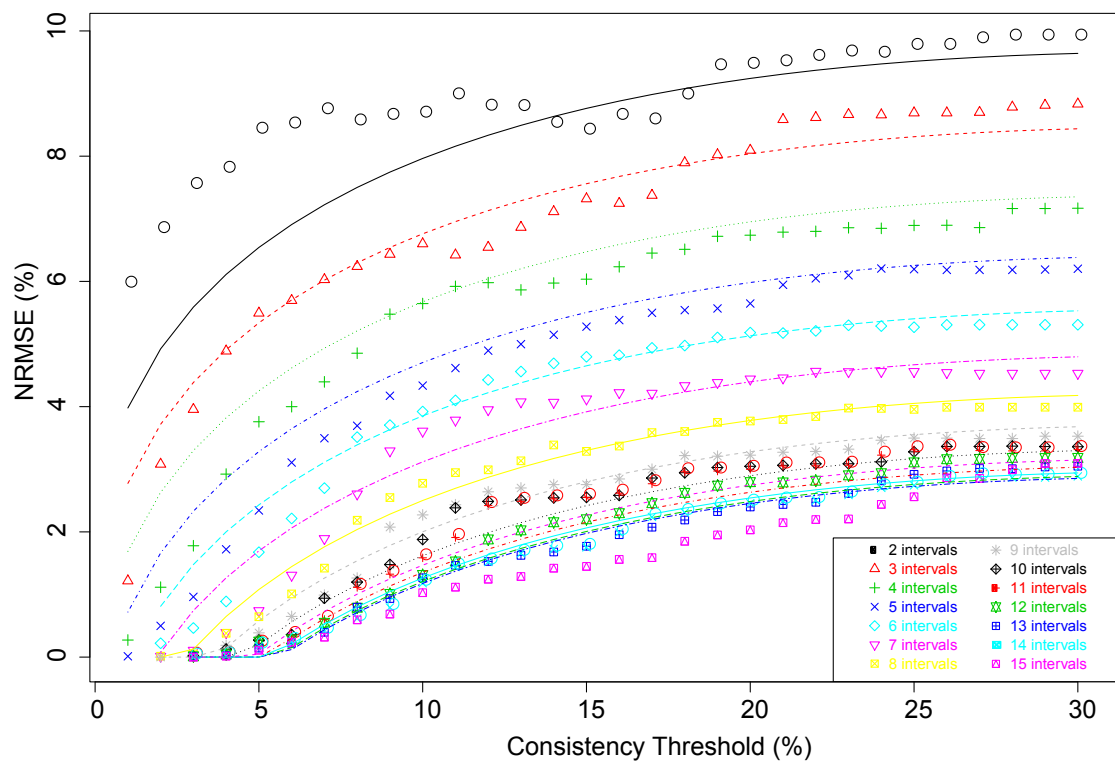

Figure S1. Linear model of the consistency/NRMSE relationship.
