# Supplementary material for: Improving the Accuracy and Efficiency of Respiratory Rate Measurements in Children Using Mobile Devices
Source: PubMed Central journal article supplement (PMC4053345; doi:10.1371/journal.pone.0099266), 2014-06-11
Supplement: pone.0099266.s003.pdf [file pone.0099266.s003.pdf]

### S3 Regression Model of median Efficiency

The coefficients  $b_2$ - $b_4$  of the regression model for  $\tilde{E}$  were significant (p-values  $< 0.001$ , table S2 ). The model is accurate with an  $R^2$  value 0.87, indicating that 87% of the variability in  $\tilde{E}$  can be accounted for by  $z$  and  $Th_C$ . Therefore, we confirm that the efficiency improves when the number of consecutive time intervals used increases, provided that number does not exceed 12 (Figure S2).

**Table S2. Efficiency Model Coefficients**

| Coefficient | Estimate | Std. Error | t value | Pr(>  t )  |
|-------------|----------|------------|---------|------------|
| $b_1$       | 0.20867  | 0.12410    | 1.68    | 0.094      |
| $b_2$       | 0.62839  | 0.03871    | 16.23   | <0.001 *** |
| $b_3$       | -0.02219 | 0.00274    | -8.09   | <0.001 *** |
| $b_4$       | 3.81354  | 0.16713    | 22.82   | <0.001 *** |

Coefficients and significance for the efficiency E linear model.

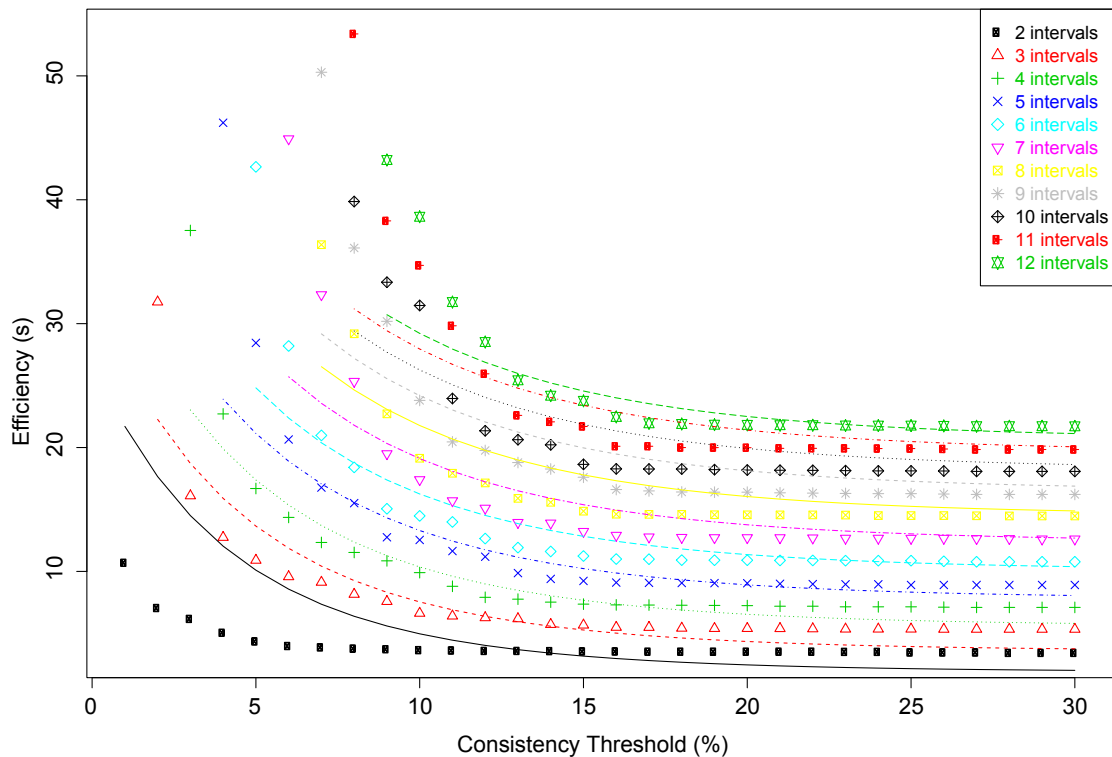

**Figure S2. Linear model of the consistency/efficiency relationship.**
